# Supplementary material
Source: PubMed Central journal article supplement (PMC5451223)
Supplement: jci-127-88725-s001.pdf [file jci-127-88725-s001.pdf]

## **Supplementary Material**

### **Disruption of spatiotemporal hypoxic signaling causes congenital heart disease**

Xuejun Yuan, Hui Qi, Xiang Li, Fan Wu, Jian Fang, Eva Bober, Gergana Dobрева, Yonggang Zhou, Thomas Braun

Max-Planck-Institute for Heart and Lung Research, Department of Cardiac Development and Remodeling, Bad Nauheim Germany

**A**

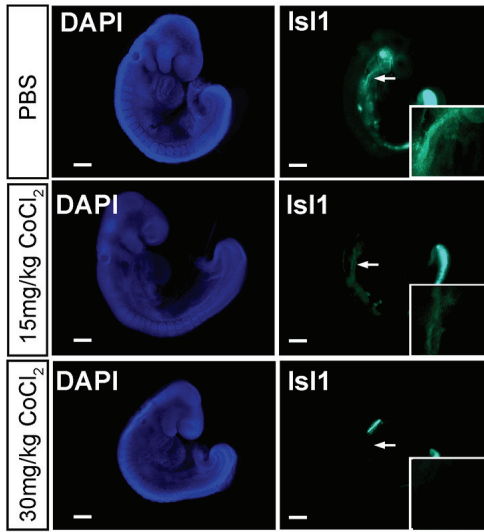

**B**

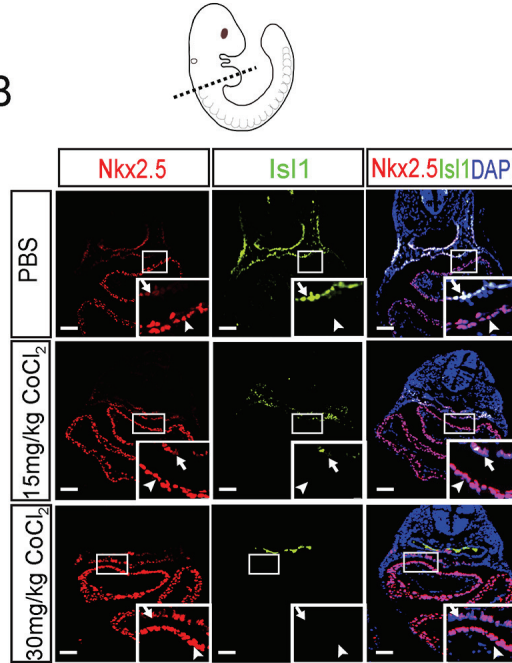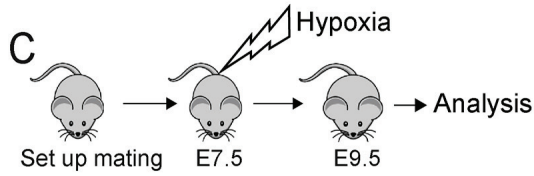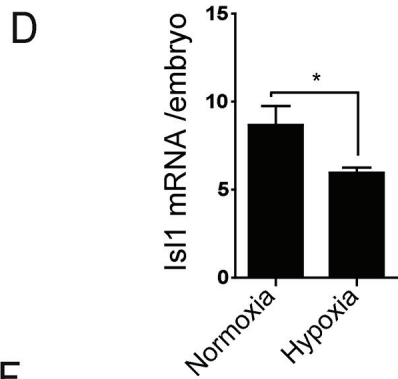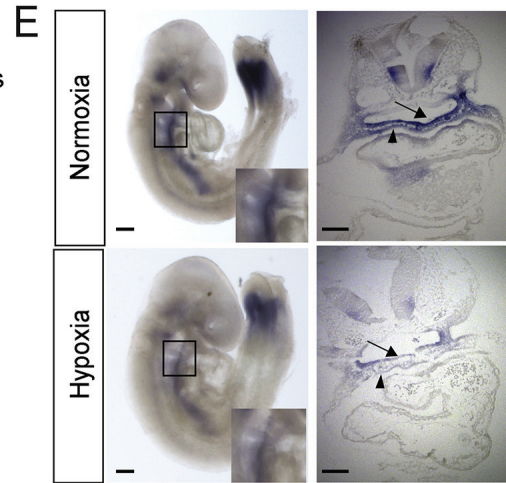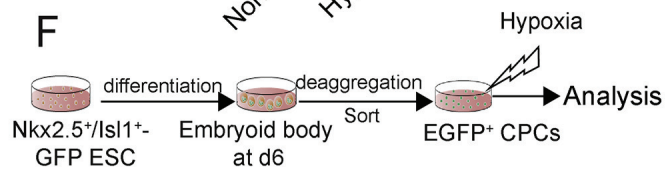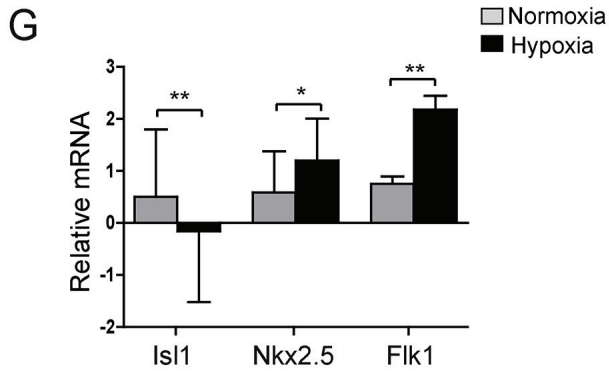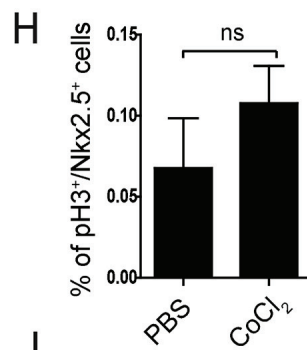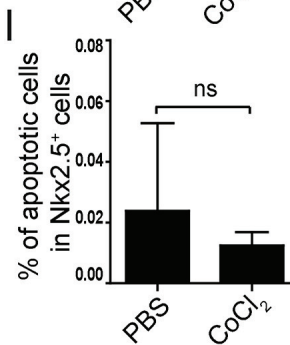

**Supplementary Figure 1: Induction of hypoxia responses represses *Isl1* expression *in vivo*.** (A) Whole-mount immunostaining of C57/Bl6 E9.0 embryos (14 somites) for *Isl1* after chemical induction of hypoxia responses (15 or 30mg CoCl<sub>2</sub>/kg body weight). Arrows indicate the *Isl1*<sup>+</sup> cardiogenic region. Representative images from 2 independent experiments are shown. Scale bar: 100 μm. (B) Representative images of E9.0 (14 somites) C57/Bl6 embryos immunostained for *ISL1* and *NKX2.5* after CoCl<sub>2</sub> treatment are shown. PBS-injected mice were used as control. Arrows indicate cardiac mesoderm and arrowheads indicate the heart tube. Analyzed embryos were randomly selected from two different litters for each condition. Scale bar: 100 μm. (C) Scheme of the strategy to induce hypoxia responses during early embryogenesis. Wild-type C57/Bl6 pregnant mice (E7.5) were housed in a hypoxia chamber containing 10% O<sub>2</sub> and 90% N<sub>2</sub> for 48 hrs to induce hypoxia responses *in vivo*. (D) RT-qPCR analysis of *Isl1* expression in C57/Bl6 E8.0 embryos (5 somites) after hypoxia exposure. The *m34b4* gene was used as a reference for normalization (t-test: \*p<0.05, n=3). (E) Analysis of *Isl1* expression in C57/Bl6 E9.0 embryos by WISH after hypoxia exposure. Arrows indicate foregut endoderm and arrowheads indicate cardiac mesoderm. Representative images from 2 independent experiments are shown. Scale bar: 100 μm. (F) Scheme of the strategy to induce hypoxia responses in *Nkx2.5*<sup>+</sup>/*Isl1*<sup>+</sup>-GFP cells isolated from embryoid bodies at day 6. (G) RT-qPCR analysis of *Isl1*, *Nkx2.5* and *Flk1* expression in embryoid bodies (EBs) at day 6 after hypoxia exposure for 16 hrs (1% O<sub>2</sub>). Please note the down-regulation of *Isl1* (n=7) but up-regulation of *Nkx2.5* (n=3) and *Flk1* (n=4). The *m34b4* gene was used as a reference for normalization. (t-test: \*p<0.05; \*\*p<0.01; n≥3). (H) Analysis of *Nkx2.5*<sup>+</sup> cells proliferation in mock or CoCl<sub>2</sub> treated E9.5 *Nkx2.5*-emGFP embryos by immunostaining for phospho-Histone H3 (Ser10) (pH3). The percentages of pH3/GFP double positive cells are shown. At least 3 sections were counted for each embryo (t-test: ns P>0.05; n=3). (I) TUNEL assay of *Nkx2.5*<sup>+</sup> cells after CoCl<sub>2</sub> treatment. The percentage of TUNEL-positive *Nkx2.5*<sup>+</sup> cells is shown. At least 4 sections were counted for each embryo (t-test: ns P>0.05; n=3).

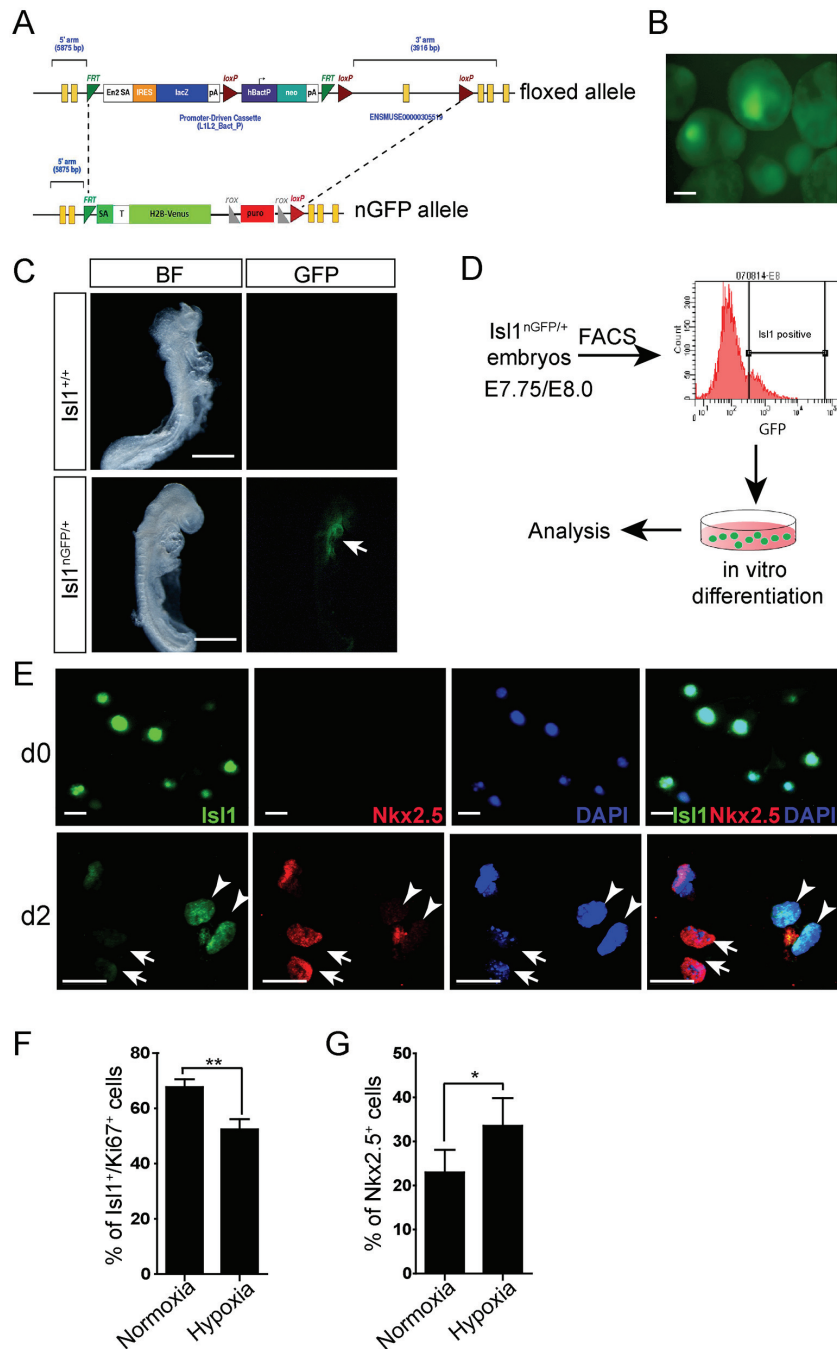

**Supplementary Figure 2: Isolation and *in vitro* differentiation of Isl1<sup>+</sup> CPCs.** (A) Scheme of the generation of Isl1<sup>nGFP/+</sup> reporter mice by dual recombinase-mediated cassette exchange. (B) Fluorescence image of GFP positive EBs at day 7 after *in vitro* differentiation of Isl1<sup>nGFP/+</sup> ES cells. Scale bar: 100  $\mu$ m. (C) Bright field and fluorescence images of control and Isl1<sup>nGFP/+</sup> embryos at E8.5 (10 somites). Isl1-GFP-positive cells are indicated by an arrow. Scale bar: 200  $\mu$ m. (D) Scheme of Isl1<sup>+</sup> CPC *in vitro* differentiation after FACS-based isolation. (E) Immunofluorescence staining of CPCs for ISL1 and NKX2.5 after 2 days culture in differentiation media. Cultivation in differentiation medium increases the number of Nkx2.5<sup>+</sup> CPCs. Arrows indicate Isl1<sup>+</sup>/Nkx2.5<sup>+</sup> CPCs and arrowheads indicate Isl1<sup>+</sup>/Nkx2.5<sup>-</sup> CPCs. Representative images from 3 independent experiments are shown. Scale bar: 100  $\mu$ m. (F) Quantification of proliferating Ki67<sup>+</sup> (immunostained) CPCs isolated from Isl1<sup>nGFP</sup> embryos (E8.0 embryos, 5-8 somites) after exposure to normoxia (n=3) or hypoxia (n=4) *in vitro*. (t-test: \*\*p<0.01). (G) Quantification of the percentage of Nkx2.5<sup>+</sup> (immunostained) cells within the population of Isl1<sup>+</sup> cells after exposure to hypoxia *in vitro*. (t-test: \*p<0.05, n=4).

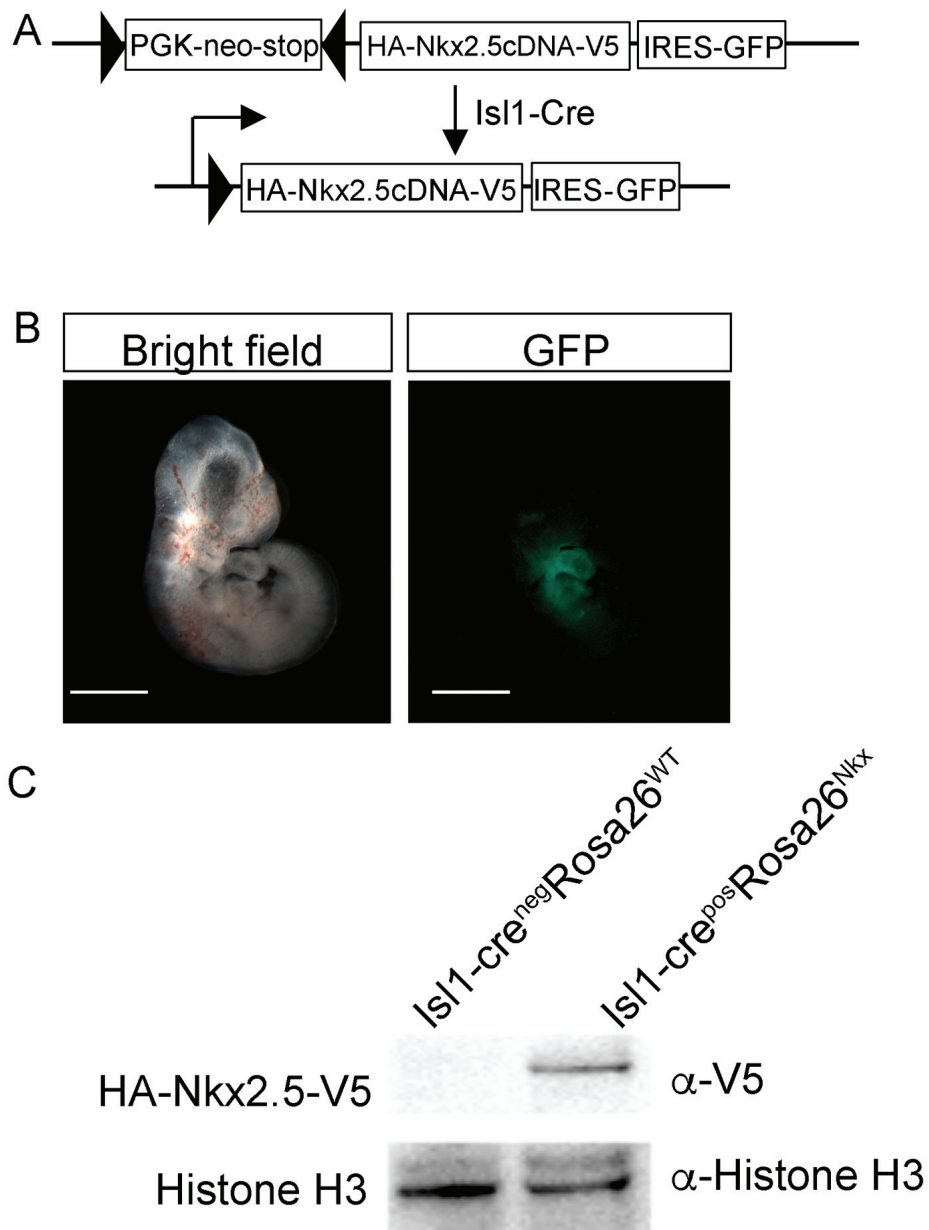

**Supplementary Figure 3: Generation of transgenic mice expressing Nkx2.5 in Isl1<sup>+</sup> cells.** (A) Outline of the strategy to express *Nkx2.5* in Isl1<sup>+</sup> cells. (B) Bright field and fluorescence images of Nkx2.5-IRES-GFP expression in E10.5 embryos (Isl1-cre<sup>pos</sup>Rosa26<sup>Nkx</sup>). Scale bar: 500 μm. (C) Western blot analysis to monitor expression of NKX2.5 in Isl1-cre<sup>pos</sup>Rosa26<sup>Nkx</sup> embryos at E9.5. Wildtype littermates were used as controls. Histone H3 was used as protein loading control.

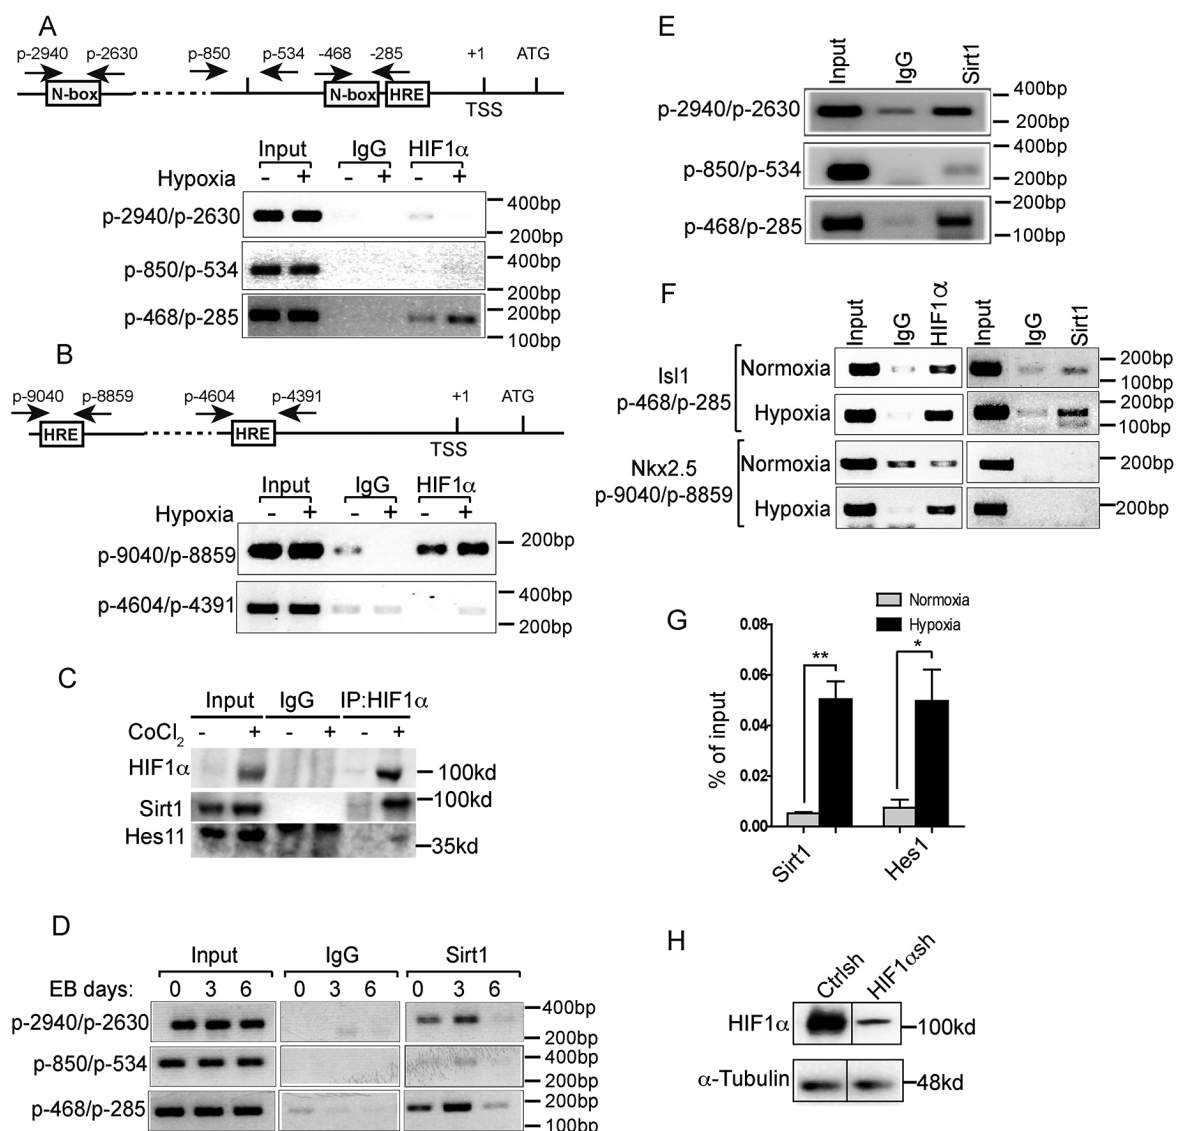

**Supplementary Figure 4: Hypoxia enhances binding of Sirt1 to the *Isl1* promoter. (A)** ChIP analysis of HIF1 $\alpha$  binding to the *Isl1* proximal promoter in differentiating ES cells (EB at day 6) with and without exposure to hypoxia. **(B)** ChIP analysis of HIF1 $\alpha$  binding to the *Nkx2.5* distal promoter in differentiating ES cells (EB at day 6). **(C)** Co-IP assay of HIF1 $\alpha$  with SIRT1 or HES1 after CoCl<sub>2</sub> treatment of V6.5 ES cells. 2.5% input was used. **(D)** ChIP analysis of SIRT1 binding to the *Isl1* proximal promoter in differentiating ES cells at different time points. **(E)** ChIP analyses of SIRT1 binding to the *Isl1* enhancer and proximal promoter in embryonic hearts at E11.5. **(F)** ChIP analysis of HIF1 $\alpha$  and SIRT1 binding to *Isl1* and *Nkx2.5* promoters in differentiating ES cells (EB at day 6). Hypoxia enhances binding of HIF1 $\alpha$  to the *Isl1* and *Nkx2.5* promoters and increases binding of SIRT1 to the *Isl1* but not the *Nkx2.5* promoter. **(G)** ChIP analysis of SIRT1 and HES1 binding to the *Isl1* proximal promoter in differentiating ES cells without and with exposure to 1% O<sub>2</sub> for 16 hrs. Note increased binding of SIRT1 and HES1 after exposure to hypoxia. The relative enrichment of SIRT1 is normalized against the input DNA. (t-test: \*p<0.05; \*\*p<0.01; n=3). **(H)** Western blot analysis of HIF1 $\alpha$  levels in differentiating ES cells exposed to CoCl<sub>2</sub> after infection with a lentivirus expressing an shRNA against *Hif1 $\alpha$* .  $\alpha$ -Tubulin was used as protein loading control. Lanes were run on the same gel but not next to each other.



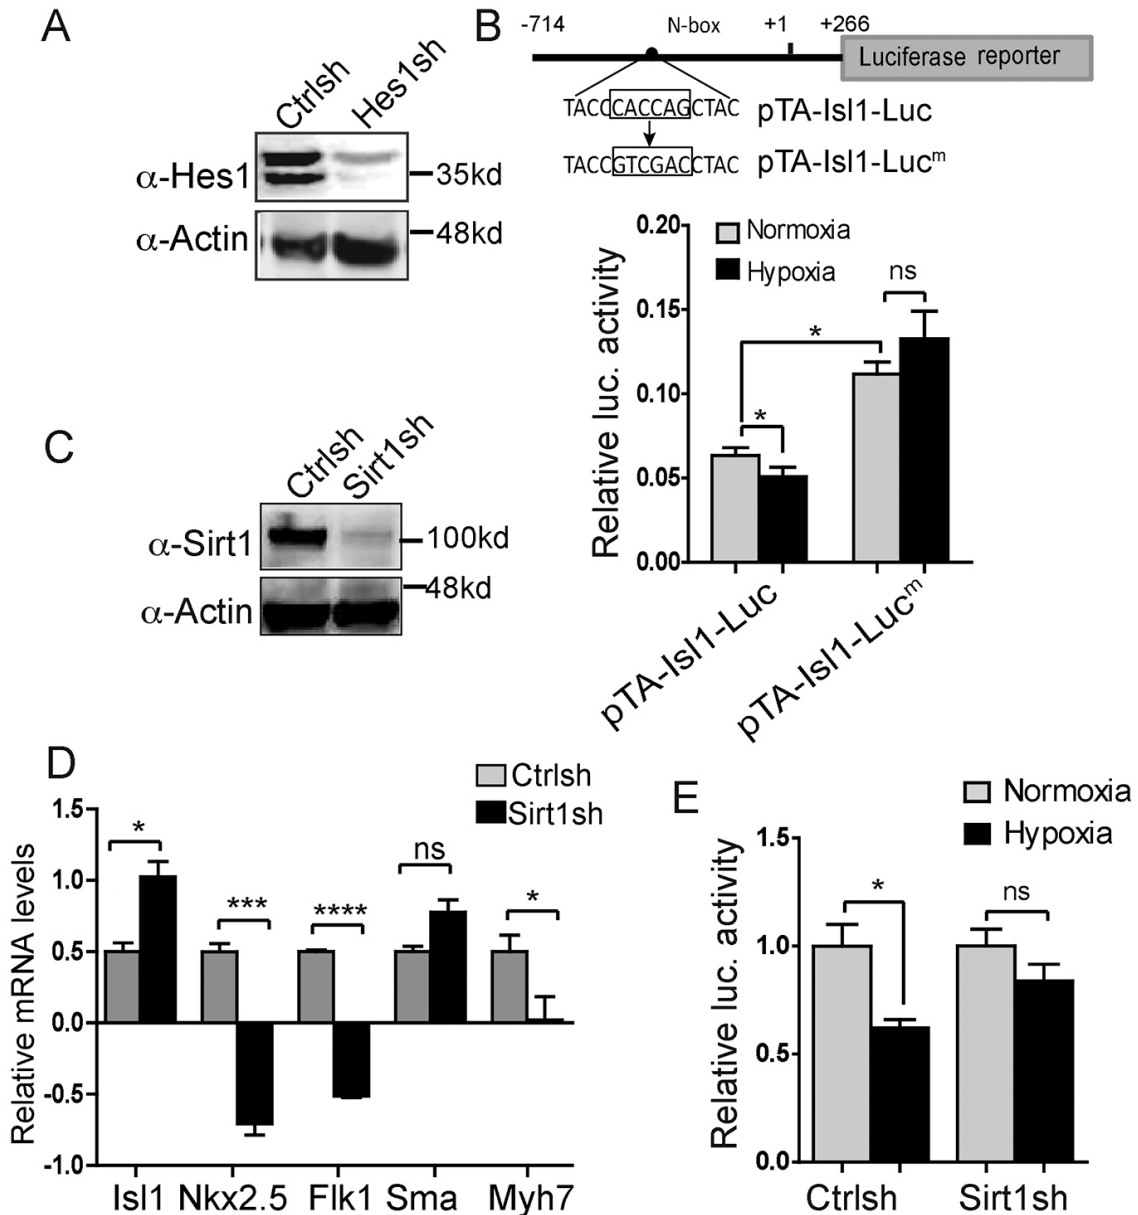

**Supplementary Figure 5: A SIRT1-HES1-containing complex mediates down-regulation of *Isl1* expression in CPCs.** (A) Western blot analysis of HES1 levels in C2C12 cells after infection with a lentivirus expressing a shRNA against *Hes1*. Actin was used as protein loading control. (B) Luciferase reporter assays of *Isl1* WT and N-box mutated promoters in C2C12 cells under normoxia or hypoxia. Mutation of the N-box increases *Isl1* promoter activity and prevents hypoxia-mediated suppression (ANOVA with Tukey's post hoc test: \* $p < 0.05$ ; ns  $p > 0.05$ ;  $n = 3$ ). (C) Western blot analysis of SIRT1 protein in V6.5 ES cells after infection with a lentivirus expressing *Sirt1* shRNA. Actin was used as loading control. (D) RT-qPCR analysis of *Isl1*, *Nkx2.5*, *Flk1* (EB at E6) and *Sma*, *Myh7* (EB at E8) expression in differentiating V6.5 ES cells after *Sirt1* knockdown. The *m34b4* gene was used as a reference for normalization (t-test: \* $p < 0.05$ ; \*\* $p < 0.001$ ; \*\*\* $p < 0.0001$ ; ns  $p > 0.05$ ,  $n = 3$ ). (E) Luciferase reporter assay of the *Isl1* promoter in C2C12 cells after knockdown of *Sirt1*, with and without exposure to hypoxia. Hypoxia fails to reduce *Isl1* promoter activity in C2C12 cells after *Sirt1* knockdown (t-test: \* $p < 0.05$ ;  $n = 3$ ).

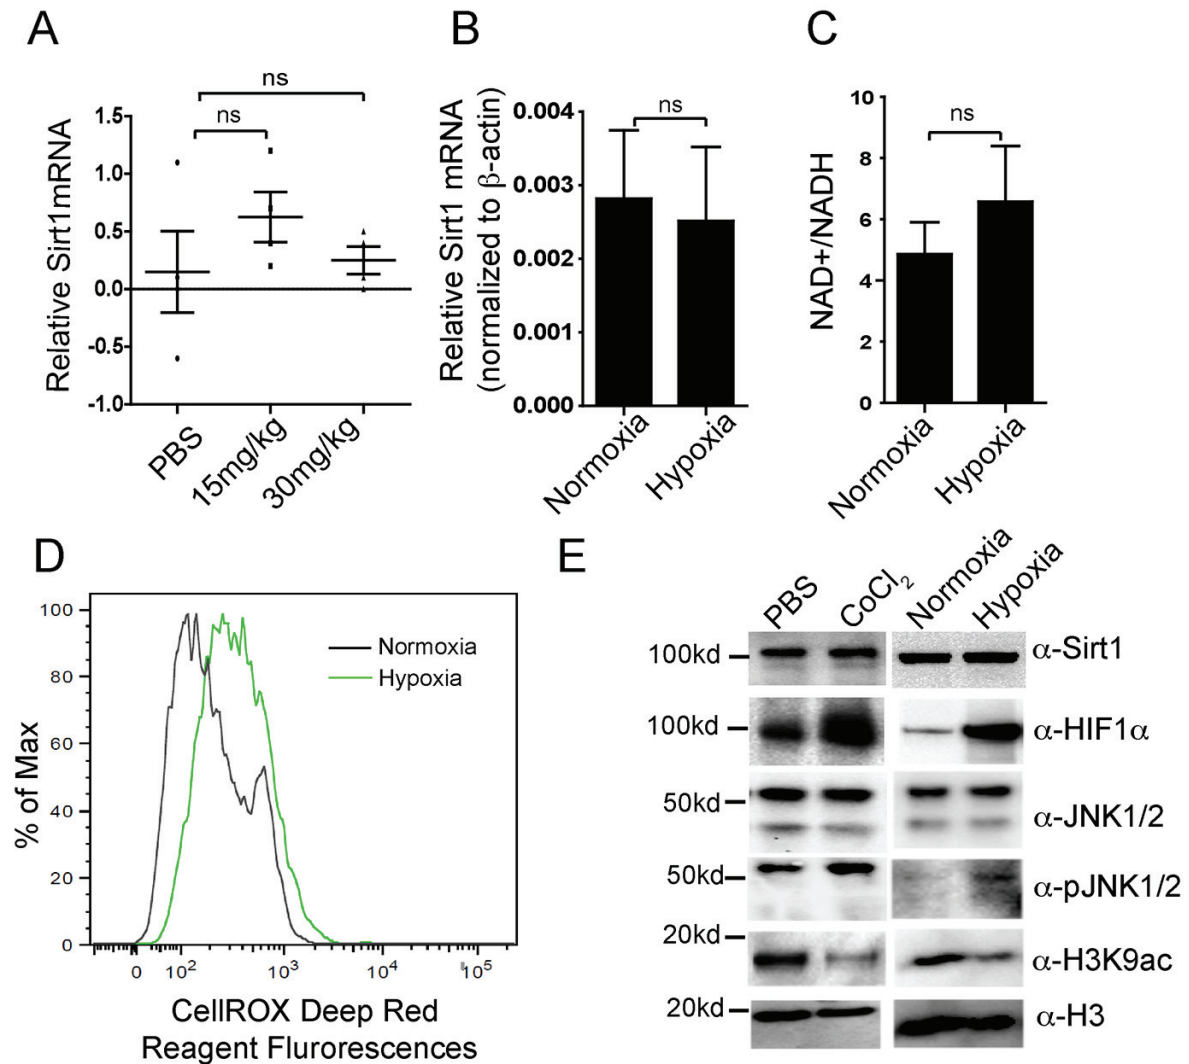

**Supplementary Figure 6: Hypoxia responses enhance the activity of SIRT1.** (A) RT-qPCR analysis of *Sirt1* expression after chemical induction of hypoxia responses (CoCl<sub>2</sub> treatment) in E8.5 embryonic hearts. The *m34b4* gene was used as a reference for normalization. ANOVA with Dunnett's post hoc test was used to calculate significance (ns p>0.05; n=4). (B) RT-qPCR analysis of *Sirt1* expression in sorted Is11<sup>+</sup> cells after cultivation under normoxia (21% O<sub>2</sub>) and hypoxia (1% O<sub>2</sub>) for 16 hours. The *β-actin* gene was used as a reference for normalization (t-test: ns p>0.05; n=6). (C) NAD<sup>+</sup>/NADH ratios in sorted Is11<sup>+</sup> cells after cultivation under normoxia (21% O<sub>2</sub>) and hypoxia (1% O<sub>2</sub>) for 16 hours. (t-test: ns p>0.05; n=3). (D) Cellular ROS levels of sorted Is11<sup>+</sup> cells under hypoxia (1% O<sub>2</sub>) and normoxia (21% O<sub>2</sub>). Two independent experiments were performed generating similar results. (E) Western blot analysis of embryonic hearts isolated from mock (PBS) or CoCl<sub>2</sub> treated (15 mg/kg bodyweight) pregnant mice (E8.5, 8-12 somites) and of sorted Is11<sup>+</sup> CPCs exposed to either normoxia (21% O<sub>2</sub>) or hypoxia (1% O<sub>2</sub>).



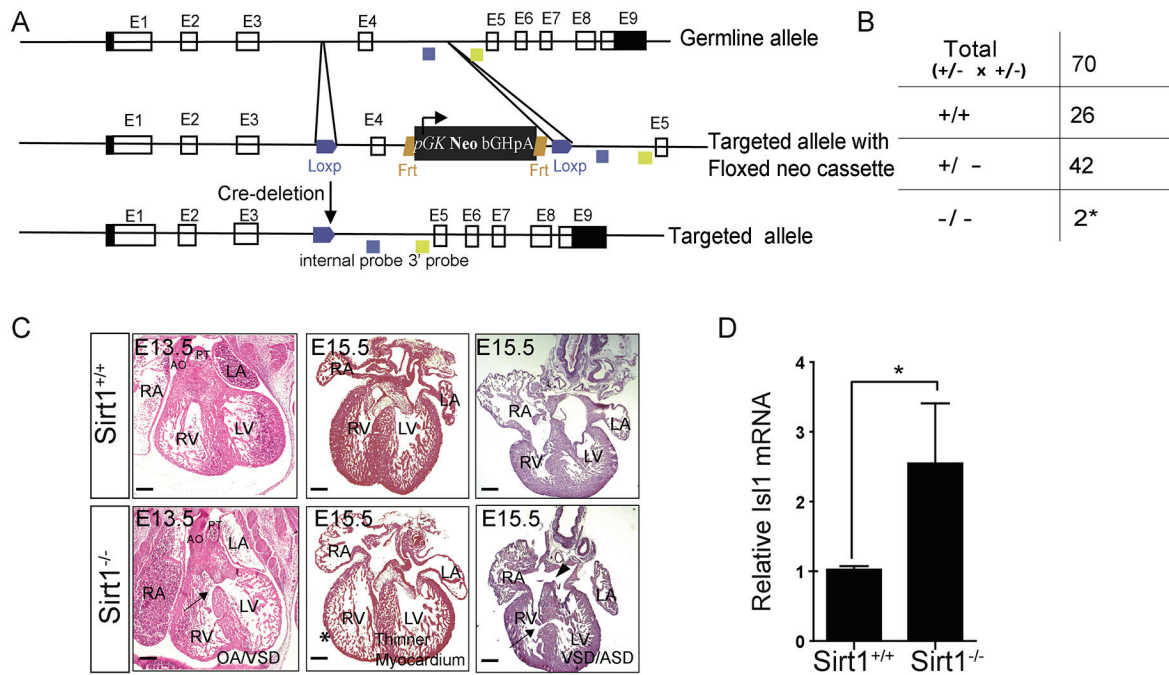

**Supplementary Figure 7: Germ line inactivation of *Sirt1* leads to multiple cardiac defects.** **(A)** Outline of the strategy to inactivate the *Sirt1* gene. **(B)** Distribution of genotypes at weaning after breeding of heterozygous *Sirt1* mutant mice. Asterisk indicates that these mice died 2 weeks after birth. **(C)** H&E staining of embryonic hearts from *Sirt1*<sup>+/+</sup> (n=6) and *Sirt1*<sup>-/-</sup> (n=6) germ line mutants. 6 littermates from 3 different litters were analyzed. Arrows indicate ventricular septum defects (2 out of 6 embryos); arrowhead indicates atrial septum defect (2 out of 6 embryos); Asterisk indicates thinner right ventricular compact layer (4 out of 6 embryos). LA: left atrium; RA: right atrium; LV: left ventricle; RV: right ventricle. Scale bars: 100  $\mu$ m. **(D)** RT-qPCR analysis of *Is1* expression in E8.0 (5 somites) *Sirt1*<sup>+/+</sup> WT and *Sirt1*<sup>-/-</sup> germ line mutants. The *m34b4* gene was used as a reference for normalization (t-test: \*p<0.05; n=4 from 2 different litters).

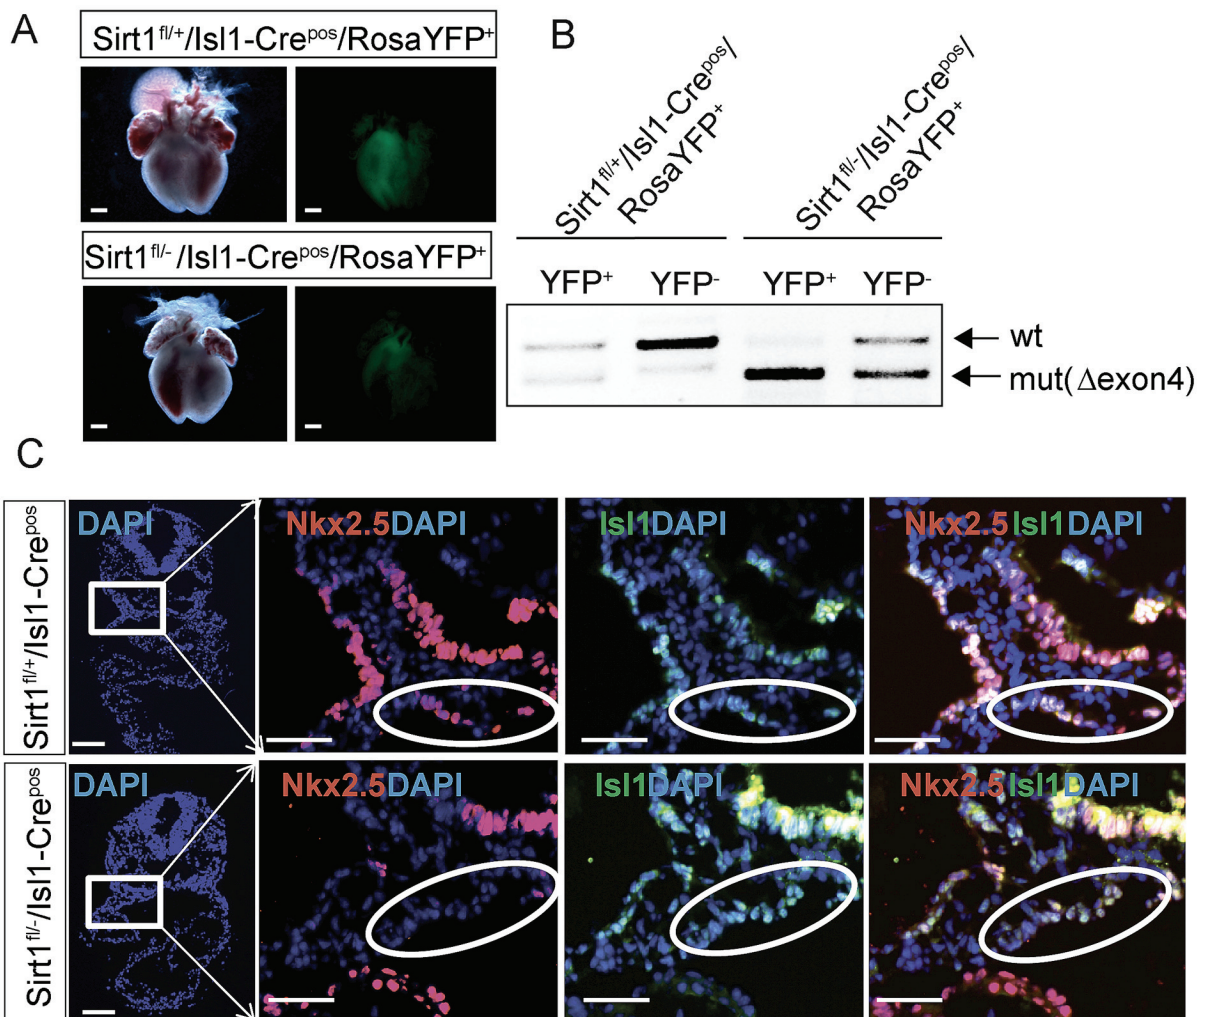

**Supplementary Figure 8: *Isl1*-Cre mediated inactivation of *Sirt1* reduces the number of  $Isl1^{+}/Nkx2.5^{+}$  cells in the cardiac mesoderm.** (A) Cell tracing of  $Isl1^{+}$  CPCs progeny (green) in E15.5  $Isl1-Cre^{pos}/Sirt1^{fl/+}/RosaYFP^{+}$  and  $Isl1-Cre^{pos}/Sirt1^{fl/-}/RosaYFP^{+}$  hearts. Scale bars: 100  $\mu$ m. (B) RT-PCR analysis of WT and mutant *Sirt1* mRNA in  $Isl1-Cre^{pos}/Sirt1^{fl/+}/RosaYFP^{+}$  and  $Isl1-Cre^{pos}/Sirt1^{fl/-}/RosaYFP^{+}$  E15.5 hearts after sorting of  $Isl1^{+}$  (YFP<sup>+</sup>) and  $Isl1^{-}$  (YFP<sup>-</sup>) cells. (C) Representative immunofluorescence images of cryosections of E9.5  $Isl1-Cre^{pos}/Sirt1^{fl/+}$  and  $Isl1-Cre^{pos}/Sirt1^{fl/-}$  hearts stained for ISL1 and NKX2.5 are shown. 3 pairs of *Sirt1* heterozygous and mutant littermates from 2 litters were analyzed. Note the decreased number of  $Isl1^{+}/Nkx2.5^{+}$  cells in the cardiac mesoderm after *Isl1*-Cre mediated knockout of *Sirt1*.

**Table S1**

| Phenotype<br>Treatment        | No obvious defect (%) | Thinner myocardium (%) | Muscular VSD (%) | OA/VSD (%) | DORV (%) | PTA (%)  | Abnormal RV dilation or hypoplasia (%) |
|-------------------------------|-----------------------|------------------------|------------------|------------|----------|----------|----------------------------------------|
| Low CoCl <sub>2</sub> (N=22)  | 5 (23%)               | 6 (27%)                | 7 (32%)          | 1 (4,5%)   | 0        | 0        | 9 (41%)                                |
| High CoCl <sub>2</sub> (N=22) | 1 (4.5%)              | 7 (32%)                | 0                | 16 (72%)   | 3 (14%)  | 1 (4.5%) | 6 (27%)                                |

**Suppl. Table 1: Incidence of cardiac structural defects in CoCl<sub>2</sub> treated C57/Bl6 embryos.** Summary of cardiac structural defects in CoCl<sub>2</sub> treated embryos detected by H&E staining of paraffin sections from E15.5 mouse hearts. The penetrance of cardiac defects in the CoCl<sub>2</sub> treated hearts with variable incidence of different CHDs is indicated. DORV, double outlet right ventricle; VSD: ventricular septal defect; PTA: persistent truncus arteriosus (PTA); OA: overriding aorta.

**Table S2**

| Phenotypes         |                                                                                                                   | No obvious defect | Thinner myocardium      | Muscular VSD | OA/VSD | Abnormal RV dilation or hypoplasia |
|--------------------|-------------------------------------------------------------------------------------------------------------------|-------------------|-------------------------|--------------|--------|------------------------------------|
| Genotypes          |                                                                                                                   |                   |                         |              |        |                                    |
| -CoCl <sub>2</sub> | <i>Sirt1</i> <sup>+/+</sup> (n=5)                                                                                 | 5                 | 0                       | 0            | 0      | 0                                  |
|                    | <i>Sirt1</i> <sup>-/-</sup> (n=6)                                                                                 | 0                 | 4 (1 out of 4 with ASD) | 1 (with ASD) | 1      | 0                                  |
|                    | <i>Sirt1</i> WT (n=6)<br>( <i>Sirt1</i> <sup>fl/+</sup> / <i>Isl1-Cre</i> <sup>neg</sup> )                        | 6                 | 0                       | 0            | 0      | 0                                  |
|                    | <i>Sirt1</i> conditional null mutants (n=7)<br>( <i>Sirt1</i> <sup>fl/fl</sup> / <i>Isl1-Cre</i> <sup>pos</sup> ) | 5                 | 2                       | 0            | 0      | 0                                  |
| +CoCl <sub>2</sub> | <i>Sirt1</i> WT (n=8)<br>( <i>Sirt1</i> <sup>fl/+</sup> / <i>Isl1-Cre</i> <sup>neg</sup> )                        | 2                 | 2 (with OA/VSD)         | 2            | 4      | 2 (with OA/VSD)                    |
|                    | <i>Sirt1</i> heterozygotes mutants (n=11)                                                                         | 11                | 0                       | 0            | 0      | 0                                  |
|                    | <i>Sirt1</i> conditional null mutants (n=8)                                                                       | 8                 | 0                       | 0            | 0      | 0                                  |

**Suppl. Table 2: Incidence of cardiac structural defects in embryos lacking *Sirt1* in the SHF with and without CoCl<sub>2</sub> treatment.** Summary of cardiac structural defects in wildtype (*Sirt1*<sup>+/+</sup>; *Sirt1*<sup>fl/+</sup>/*Isl1-Cre*<sup>neg</sup>), heterozygous (*Sirt1*<sup>fl/-</sup>/*Isl1-Cre*<sup>neg</sup>; *Sirt1*<sup>fl/+</sup>/*Isl1-Cre*<sup>pos</sup>) and homozygous (*Sirt1*<sup>-/-</sup>; *Sirt1*<sup>fl/-</sup>/*Isl1-Cre*<sup>pos</sup>) *Sirt1* mutant embryos detected by H&E staining of paraffin sections from E15.5 mouse hearts without (11 embryos from 3 litters mated for germline null embryos and 13 embryos from 4 litters mated for conditional null embryos) or with (27 embryos from 4 litters) CoCl<sub>2</sub> treatment. The incidence of different cardiac defects in CoCl<sub>2</sub> or untreated hearts with CHDs is indicated. RV: right ventricle; VSD: ventricular septal defect; ASD: atrial septal defect; OA: overriding aorta.

**Suppl. Table 3: List of primers used for genotyping, chromatinIP and mutagenesis in the study**

| Name            | Primer sequence (5'-->3')                                                  | Application                         |
|-----------------|----------------------------------------------------------------------------|-------------------------------------|
| mSirt1loxP P3 F | GGCAGTATGTGGCAGATT                                                         | Floxed and deleted Sirt1 genotyping |
| mSirt1loxP P4 R | CCTGAAACAGACAAGACCT                                                        | Floxed Sirt1 genotyping             |
| mSirt1loxP P6 R | GAACATAACAGCCAGGCAT                                                        | Deleted Sirt1 genotyping            |
| Isl1F           | ACTATTTGCCACCTAGCCACAGCA                                                   | Isl1-Cre genotyping                 |
| Isl1R           | AATTCACACCAAACATGCAAGCTG                                                   | Isl1-Cre genotyping                 |
| CreR            | CTAGAGCCTGTTTTGCACGTTT                                                     | Isl1-Cre genotyping                 |
| Nkx2.5F         | TAAACTGGTCGAGCGATGGATTTC                                                   | Nkx2.5-Cre genotyping               |
| Nkx2.5R         | CATATCTCGCGCGGCTCCGACACGG                                                  | Nkx2.5-Cre genotyping               |
| nGFPF           | CTCTTGATTCCCACCTTTGTGGTTC                                                  | Isl1-nGFP genotyping                |
| nGFPR           | TCAGTAAGCTATGGGTTAGAG                                                      | Isl1-nGFP genotyping                |
| Isl1ISHF        | GGTCCCAGCCGTGCAGGTCC                                                       | DNA probe for ISH                   |
| Isl1ISHR        | GCGCGCTGGATGCAAGGGACTG                                                     | DNA probe for ISH                   |
| Hes1mF          | GGACCTACCGTCGACCTACTCGCCACGGGCGGCAG                                        | Mutagenesis                         |
| Hes1mR          | GGCGAGTAGGTCGACGGTAGGTCCTTCCTGTG                                           | Mutagenesis                         |
| Isl1P-KpnI      | GGTACCTTGGAGAGCTCAGATTGG                                                   | Luciferase reporter                 |
| Isl1P-HindIII   | AAGCTTATCTGTAAGAGGGAGTAATG                                                 | Luciferase reporter                 |
| HA-Nkx2.5       | CTAGCTAGCACGATGTACCCATACGATGTTCCAGAT<br>TACGCTTCCCCAGCCCTGCGCTC            | Nkx2.5 expression vector            |
| Nkx2.5-V5       | ACGCGTCGACCTACGTAGAGTCGAGACCGAGGAGA<br>GGGTTAGGGATAGGCTTACCCAGGCTCGGATGCCG | Nkx2.5 expression vector            |
| Isl1p-2940      | GCGCCAGGAACTGTGCTCAA<br>AGGGGCGACCTCTGTGTCAATG                             | ChIP                                |
| Isl1p-850       | GAACAGGAGACCTCACGGGTCCGG<br>CTAGCAGCGCGCTACGCGTTAGGG                       | ChIP                                |
| Nkx2.5p-4604    | TTTCTCAACCTTTTCGCCTATTCA<br>GTTTTCTCCACCCCTTCATCTG                         | ChIP                                |
| Nkx2.5p-9556    | GTGCCCCAGTGACCCGCTCCAT<br>TATCTCCCTTCCCCGCTGTTGTCC                         | ChIP                                |
| Nkx2.5p-2581    | AGGCAAAGAAATCACTCCACA<br>TGTTACAATGGCTGGGAA                                | ChIP                                |

**Suppl. Table 4: List of primers used for qPCR in the study**

| Name         | Primers                                                 | Application | Ta (°C) | Efficiency (%) | Amplicon size (bp) | Position (start) |
|--------------|---------------------------------------------------------|-------------|---------|----------------|--------------------|------------------|
| Isl1         | CTGCGGGAGGATGGGCTTTTCT<br>GGTCTTCTCCGGCTGCTTGTGG        | qRT         | 61      | 97             | 179                | 631              |
| Flk1         | GGGATGGTCCTTGCATCAGAA<br>ACTGGTAGCCACTGGTCTGGTTG        | qRT         | 58      | 100            | 139                | 4036             |
| Nkx2.5       | ACCTTTCTCCGATCCATCCCCT<br>GCGTTAGCGCACTCACTTTAATG       | qRT         | 58      | 100            | 227                | 1504             |
| CD31         | GCTCATTGCGGTGGTTGTCAT<br>CATCTCCACGGGTTTCTGTTG          | qRT         | 58      | 95             | 106                | 2003             |
| Myh11        | CGCCCAGAAAAACAATGCCCTAAA<br>GCGTATCCTCCAGCTCCGTCTTGA    | qRT         | 61      | 100            | 167                | 3458             |
| Myh6         | GCCCAGTACCTCCGAAAGTC<br>GCCTTAACATACTCCTCCTTGTG         | qRT         | 61      | 100            | 110                | 239              |
| Hand1        | AAGACTCTGCGCCTGGCTACCA<br>CGCCCTTAATCCTCTTCTCGC         | qRT         | 61      | 98             | 205                | 761              |
| Hand2        | ACTCAGAGCATCAACAGCGCCTTC<br>TGTGCTTTTCAAGATCTCATTGAGCTC | qRT         | 61      | 95             | 242                | 1258             |
| Mef2c        | GAGCAGTTCTGTGTTCTTTTGC<br>ATCCCTCTGCACAAGTGTCTG         | qRT         | 53      | 96             | 129                | 1                |
| Tbx5         | ACTGGCCTTAATCCCAAAAC<br>GGTGAGTTTGTGCTTCTGGA            | qRT         | 53      | 100            | 210                | 927              |
| Sma          | TCAGCGCCTCCAGTTTCT<br>AAAAAAAACCACGAGTAACAAATCAA        | qRT         | 56      | 100            | 69                 | 1289             |
| Myh7         | GCCAACACCAACCTGTCCAAGTTC<br>TGCAAAGGCTCCAGGTCTGAGGGC    | qRT         | 63      | 100            | 179                | 5806             |
| β-actin      | CATGAAGATCCTGACCGAGCGTGG<br>TGCTCGAAGTCTAGAGCAACATAGC   | qRT         | 61      | 95             | 108                | 676              |
| Sirt1        | GCAGGTTGAGGAATCCAA<br>GGCAAGATGCTGTTGCAAA               | qRT         | 55      | 98             | 62                 | 1094             |
| 36b4         | TCCAGGCTTTGGGCATCA<br>CTTTATCAGCTGCACATCACTCAGA         | qRT         | 56      | 100            | 74                 | 534              |
| Isl1p-468    | AAAGCGGCCCGTTCCAAGTGC<br>GCGCCGCTCGTGTCTG               | ChIP        | 61*     | 99             | 178                | -468             |
| Nkx2.5p-9040 | AAAGTCCCCGCGAGTGTGTGT<br>TTGGTGAAAAGCGGGATGGAGACG       | ChIP        | 61*     | 100            | 183                | -9040            |
| Nkx2.5p-4604 | TTTCTAACCTTTTCGCCTATTCA<br>GTTTTCTCCACCCCTTCATCTG       | ChIP        | 61      | 93             | 234                | -4604            |
| Nkx2.5p-9556 | GTGCCCCAGTGACCCGCTCCAT<br>TATCTCCCTTCCCCGCTGTTGTCC      | ChIP        | 63      | 100            | 201                | -9556            |
| Nkx2.5p-2581 | AGGCAAAGAAATCACTCCACA<br>TGTTACAATGGCTGGGAA             | ChIP        | 55      | 93             | 155                | -2581            |

qRT: Real-Time Quantitative Reverse Transcription PCR; \*: PCR contains 4% DMSO.



**Suppl. Table 5: List of antibodies used in the study.**

| Antibody                | Use          | Use Supplier             | Cat. No.  |
|-------------------------|--------------|--------------------------|-----------|
| Histone H3              | WB, ChIP     | Abcam                    | ab1791    |
| H3K9ac                  | WB, ChIP     | Abcam                    | ab4441    |
| H4K16ac                 | ChIP         | Abcam                    | ab10158   |
| Isl1                    | IF, WB, ChIP | Hybridoma Bank           | 39.4D5    |
| Nkx2.5                  | IF, WB       | Abcam                    | ab35842   |
| Nkx2.5                  | WB           | Santa Cruz               | Sc-376565 |
| V5                      | WB           | Abcam                    | Ab9116    |
| HIF1 $\alpha$           | WB, IP       | Bethyl                   | A300-286A |
| HIF1 $\alpha$           | ChIP         | Novus Biologicals        | NB100-134 |
| CD31-APC                | FACS         | eBioscience              | 17-0311   |
| cTNT                    | FACS         | Abcam                    | ab8295    |
| Myh11-PE                | FACS         | Santa Cruz Biotechnology | sc-6956   |
| Flk1-PE                 | FACS         | BD Biosciences           | 555308    |
| Sirt1                   | IF, WB, IP   | Cell signaling           | 2028      |
| Sirt1                   | ChIP         | Millipore                | 07-131    |
| pHistone 3              | IF           | Cell signaling           | 9701      |
| Hes1                    | WB, IP       | Santa Cruz               | sc-25392  |
| JNK 1/2                 | WB           | Cell signaling           | 9258      |
| pJNK1/2                 | WB           | Cell signaling           | 9251      |
| $\alpha$ -Tubulin       | WB           | Sigma                    | T6074     |
| $\alpha$ -sarc.-Actinin | WB           | Sigma                    | A7811     |
| $\alpha$ -Actin         | WB           | Sigma                    | A5441     |
| M2(Flag)                | WB, IP       | Sigma                    | A2220     |
| Myc                     | WB, IP       | Cell signaling           | 2278      |
| HDAC1                   | WB, ChIP     | Cell signaling           | 5356      |
| HDAC5                   | WB, ChIP     | Active Motif             | 40970     |

IF: Immunofluorescence, WB: Western blot, IP: immunoprecipitation, ChIP: Chromatin
